# Supplementary material
Source: PubMed Central journal article supplement (PMC8118856)
Supplement: 1065tables.pdf [file 1065tables.pdf]

**On-Line Table: Location and size of SDHs in 46 patients**

| Patient No. | Delivery Method | Assistance |         |     | Location of SDH |      |      |                 | SDH Size* |
|-------------|-----------------|------------|---------|-----|-----------------|------|------|-----------------|-----------|
|             |                 | Vac        | Forceps | Oxy | Supratentorial  |      |      | Posterior Fossa |           |
|             |                 |            |         |     | Occ             | Tent | Falx |                 |           |
| 1           | V               |            |         | x   | x               | x    | x    | x               | 3.3       |
| 2           | V               |            |         |     | x               |      |      | x               | 2.0       |
| 3           | V               |            |         | x   | x               |      |      | x               | 1.6       |
| 4           | V               |            |         |     |                 |      |      | x               | 2.1       |
| 5           | V               | x          |         |     |                 |      |      | x               | 2.2       |
| 6           | V               |            |         | x   | x               | x    |      | x               | 1.6       |
| 7           | V               |            |         |     | x               | x    |      | x               | 1.6       |
| 8           | V               | x          |         | x   | x               |      |      | x               | 2.5       |
| 9           | V               |            |         | x   | x               |      |      | x               | 2.1       |
| 10          | V               |            |         |     |                 |      |      | x               | 1.0       |
| 11          | V               |            |         |     | x               |      |      | x               | 1.4       |
| 12          | V               |            |         | x   | x               | x    |      | x               | 2.2       |
| 13          | V               |            |         | x   | x               |      |      | x               | 1.6       |
| 14          | V               |            |         |     | x               | x    |      | x               | 2.1       |
| 15          | V               |            |         |     | x               |      |      |                 | 2.2       |
| 16          | V               |            |         |     |                 | x    |      | x               | 2.2       |
| 17          | V               |            |         |     |                 | x    |      | x               | 2.8       |
| 18          | C/S             |            |         |     | x               |      |      |                 | 1.6       |
| 19          | V               |            |         | x   | x               | x    |      | x               | 2.2       |
| 20          | V               |            |         |     | x               | x    |      | x               | 3.0       |
| 21          | V               |            |         | x   | x               | x    |      | x               | 2.0       |
| 22          | V               |            |         | x   |                 | x    |      | x               | 2.0       |
| 23          | V               |            |         |     |                 | x    |      | x               | 2.2       |
| 24          | V               |            |         |     | x               |      |      | x               | 2.2       |
| 25          | C/S             |            |         | x   | x               | x    |      | x               | 2.5       |
| 26          | C/S             | v          |         | x   |                 |      |      | x               | 1.4       |
| 27          | V               |            |         | x   |                 |      |      | x               | 1.6       |
| 28          | V               | x          |         |     |                 | x    |      | x               | 2.0       |
| 29          | V               |            |         |     | x               | x    |      | x               | 2.5       |
| 30          | V               | x          | x       | x   |                 | x    |      | x               | 2.9       |
| 31          | V               |            | x       | x   |                 | x    |      | x               | 1.4       |
| 32          | V               |            |         | x   |                 | x    |      | x               | 2.2       |
| 33          | V               | x          |         | x   |                 | x    |      | x               | 1.4       |
| 34          | V               |            |         | x   | x               | x    |      | x               | 2.1       |
| 35          | V               | x          |         | x   | x               |      |      | x               | 1.0       |
| 36          | V               |            |         | x   | x               |      |      | x               | 4.3       |
| 37          | V               |            |         |     |                 | x    |      | x               | 2.8       |
| 38          | V               |            |         | x   | x               |      |      | x               | 1.4       |
| 39          | C/S             |            |         | x   | x               |      |      |                 | 2.1       |
| 40          | V               |            |         |     | x               |      |      | x               | 2.2       |
| 41          | V               | x          |         | x   | x               |      |      |                 | 1.0       |
| 42          | V               |            | x       |     | x               |      |      | x               | 1.6       |
| 43          | V               |            | x       | x   | x               |      |      |                 | 1.6       |
| 44          | V               |            |         | x   |                 |      |      | x               | 2.1       |
| 45          | V               |            |         |     | x               |      |      | x               | 2.0       |
| 46          | V               |            |         |     |                 | x    |      | x               | 2.2       |

**Note:**—Vac indicates vacuum; Oxy, oxytocin; Occ, occipital; Tent, tentorial; Falx, falx/parafalcine; V, vaginal; C/S, cesarean delivery.  
 \* Size of largest SDH in millimeters.
